# Supplementary material for: Structural insight on assembly-line catalysis in terpene biosynthesis
Source: PubMed Central journal article supplement (PMC8190136; doi:10.1038/s41467-021-23589-9), 2021-06-09
Supplement: 41467_2021_23589_MOESM1_ESM.pdf [file 41467_2021_23589_MOESM1_ESM.pdf]

--- SUPPLEMENTARY INFORMATION ---

# **Structural Insight on Assembly-Line Catalysis in Terpene Biosynthesis**

Jacque L. Faylo,<sup>1</sup> Trevor van Eeuwen,<sup>2</sup> Hee Jong Kim,<sup>2</sup> Jose J. Gorbea Colón,<sup>2</sup> Benjamin A.  
Garcia,<sup>2</sup> Kenji Murakami,<sup>2</sup> and David W. Christianson<sup>1,\*</sup>

<sup>1</sup>Roy and Diana Vagelos Laboratories, Department of Chemistry, University of Pennsylvania,  
231 South 34<sup>th</sup> Street, Philadelphia, PA 19104-6323, United States

<sup>2</sup>Department of Biochemistry and Biophysics, Perelman School of Medicine, University of  
Pennsylvania, Philadelphia, PA 19104-6323, United States

## Supplementary Information

Supplementary Table 1. Data Collection and Refinement Statistics.

|                                                         | PaFS Prenyltransferase Octamer (EMD-22473) | Asymmetric PaFS Prenyltransferase Octamer (EMD-23602) |
|---------------------------------------------------------|--------------------------------------------|-------------------------------------------------------|
| <b>EM data collection and reconstruction statistics</b> |                                            |                                                       |
| Magnification                                           | 36,000x                                    | 36,000x                                               |
| Voltage (kV)                                            | 200                                        | 200                                                   |
| Exposure (e <sup>-</sup> /Å <sup>2</sup> )              | 43                                         | 43                                                    |
| Defocus range (µm)                                      | 1.5 - 2.7                                  | 1.5 - 2.7                                             |
| Pixel size (Å/pix)                                      | 1.142                                      | 1.142                                                 |
| Symmetry imposed                                        | C2                                         | C1                                                    |
| Initial particles (no.)                                 | 295,238                                    | 295,238                                               |
| Final particles (no.)                                   | 94,974                                     | 94,974                                                |
| Map resolution (Å)                                      |                                            |                                                       |
| FSC threshold 0.143                                     | 3.99                                       | 4.18                                                  |
| <b>Model</b>                                            |                                            |                                                       |
| Initial model used (PDB code)                           | 5ERN (Chains A and B)                      |                                                       |
| Model composition (#)                                   |                                            |                                                       |
| Chains                                                  | 8                                          |                                                       |
| Atoms                                                   | 14628 (Hydrogens: 0)                       |                                                       |
| Residues                                                | Protein: 2332                              |                                                       |
| Water                                                   | 0                                          |                                                       |
| Ligands                                                 | 0                                          |                                                       |
| R.m.s. deviations                                       |                                            |                                                       |
| Length (Å)                                              | 0.003                                      |                                                       |
| Angles (°)                                              | 0.6                                        |                                                       |
| <b>Validation</b>                                       |                                            |                                                       |
| MolProbity score                                        | 2.06                                       |                                                       |
| Clash score                                             | 9.28                                       |                                                       |
| Poor rotamers (%)                                       | 0.45                                       |                                                       |
| Ramachandran plot (%)                                   |                                            |                                                       |
| Favored                                                 | 89.39                                      |                                                       |
| Allowed                                                 | 10.03                                      |                                                       |
| Disallowed                                              | 0.61                                       |                                                       |
| Peptide plane (%)                                       |                                            |                                                       |
| Cis proline/general                                     | 0.0/0.0                                    |                                                       |
| Twisted proline/general                                 | 0.0/0.0                                    |                                                       |
| PDB accession code                                      | 7JTH                                       |                                                       |
| <b>Model vs. Data</b>                                   |                                            |                                                       |
| CC (mask)                                               | 0.74                                       |                                                       |
| CC (box)                                                | 0.79                                       |                                                       |
| CC (peaks)                                              | 0.76                                       |                                                       |
| CC (volume)                                             | 0.76                                       |                                                       |

**Supplementary Table 2. Data Collection and Refinement Statistics of Fixed PaFS.**

|                                                     | Crosslinked PaFS prenyltransferase octamer (C2) (EMD-23611) | Crosslinked PaFS prenyltransferase octamer (C1) (EMD-23610) | PaFS with capping cyclase domain (EMD-22489) | PaFS with pooled peripheral cyclase domains (EMD 22484) | PaFS with peripheral cyclase domain A (EMD-22485) | PaFS with peripheral cyclase domain B (EMD-22487) | PaFS with peripheral cyclase domain C (EMD-22488) |
|-----------------------------------------------------|-------------------------------------------------------------|-------------------------------------------------------------|----------------------------------------------|---------------------------------------------------------|---------------------------------------------------|---------------------------------------------------|---------------------------------------------------|
| <b>Data collection and processing</b>               |                                                             |                                                             |                                              |                                                         |                                                   |                                                   |                                                   |
| Magnification                                       | 81,000                                                      | 81,000                                                      | 81,000                                       | 81,000                                                  | 81,000                                            | 81,000                                            | 81,000                                            |
| Voltage (kV)                                        | 300                                                         | 300                                                         | 300                                          | 300                                                     | 300                                               | 300                                               | 300                                               |
| Electron exposure (e <sup>-</sup> /Å <sup>2</sup> ) | 50                                                          | 50                                                          | 50                                           | 50                                                      | 50                                                | 50                                                | 50                                                |
| Defocus range (μm)                                  | 1 - 2.25                                                    | 1 - 2.25                                                    | 1 - 2.25                                     | 1 - 2.25                                                | 1 - 2.25                                          | 1 - 2.25                                          | 1 - 2.25                                          |
| Physical pixel size (Å)                             | 1.08                                                        | 1.08                                                        | 1.08                                         | 1.08                                                    | 1.08                                              | 1.08                                              | 1.08                                              |
| Symmetry imposed                                    | C2                                                          | C1                                                          | C1                                           | C4 (symmetry expanded)<br>C1 (refinement)               | C4 (symmetry expanded)<br>C1 (refinement)         | C4 (symmetry expanded)<br>C1 (refinement)         | C4 (symmetry expanded)<br>C1 (refinement)         |
| Initial particles (no.)                             | 312,022                                                     | 312,022                                                     | 312,022                                      | 312,022                                                 | 312,022                                           | 312,022                                           | 312,022                                           |
| Final particles (no.)                               | 48,325                                                      | 48,325                                                      | 9,745                                        | 104,866                                                 | 34,712                                            | 34,583                                            | 35,571                                            |
| Map resolution (Å)<br>at FSC threshold 0.143        | 7.4                                                         | 7.8                                                         | 11.9                                         | 7.4                                                     | 8.5                                               | 8.6                                               | 9.4                                               |
| <b>Model</b>                                        |                                                             |                                                             |                                              |                                                         |                                                   |                                                   |                                                   |
| Prenyltransferase fitting model (PDB code)          | 7JTH                                                        |                                                             |                                              |                                                         |                                                   |                                                   |                                                   |
| Cyclase fitting model (PDB code)                    | 5ER8                                                        |                                                             |                                              |                                                         |                                                   |                                                   |                                                   |

Supplementary Table 3. Observed crosslinks determined by XL-MS.

| Peptide 1                                                  | Peptide 2                | Abs Pos 1 | Abs Pos 2 | Relative Score | Dist (Å) | # Meas. |
|------------------------------------------------------------|--------------------------|-----------|-----------|----------------|----------|---------|
| <b>(a) Prenyltransferase-Prenyltransferase Cross Links</b> |                          |           |           |                |          |         |
| KHGGMTLEQK                                                 | KHGGMTLEQK               | 656       | 656       | 100            | 5.6      | 4       |
| VPDVKVGK                                                   | IKDAVR                   | 455       | 460       | 71.0           | 8.4      | 8       |
| SHMALLNVLSTGR                                              | QFVLDIIIEEKSLDYTR        | 643       | 676       | 70.4           | 12.4     | 8       |
| SHMALLNVLSTGR                                              | KHGGMTLEQK               | 652       | 656       | 68.6           | 5.9      | 16      |
| GKPSTHNIFGSAQTVNTATYSIIK                                   | QFVLDIIIEEKSLDYTR        | 486       | 681       | 64.3           | 25.3     | 8       |
| GKPSTHNIFGSAQTVNTATYSIIK                                   | KHGGMTLEQK               | 486       | 656       | 61.2           | 19.0     | 8       |
| QKGFBEDLDEGK                                               | KHGGMTLEQK               | 619*      | 656       | 59.8           | 18.0     | 8       |
| SHmALLNVLSTGR                                              | KHGGMTLEQK               | 653       | 656       | 58.7           | 4.9      | 4       |
| GKPSTHNIFGSAQTVNTATYSIIK                                   | SHMALLNVLSTGR            | 486       | 643       | 56.4           | 11.9     | 8       |
| WSLALIHMIHKQR                                              | QFVLDIIIEEKSLDYTR        | 640       | 676       | 55.4           | 10.9     | 8       |
| AVLEAPYDYIASMPKSGVR                                        | GKPSTHNIFGSAQTVNTATYSIIK | 435       | 486       | 50.3           | 15.1     | 8       |
| IKDAVR                                                     | TKIQSBLHR                | 460       | 585       | 48.0           | 23.3     | 8       |
| VPDVKVGK                                                   | TKIQSBLHR                | 455       | 584       | 47.5           | 18.2     | 8       |
| RGKPSSTHNIFGSAQTVNTATYSIIK                                 | QFVLDIIIEEKSLDYTR        | 488       | 676       | 47.0           | 22.9     | 8       |
| KHGGMTLEQK                                                 | HGGMTLEQKQFVLDIIIEEK     | 656       | 661       | 45.4           | 11.8     | 16      |
| AVLEAPYDYIASMPKSGVR                                        | VLHNSLLLLDDFQDNSPLR      | 435       | 469       | 43.1           | 16.0     | 8       |
| VLHNSLLLLDDFQDNSPLRR                                       | KHGGMTLEQK               | 480       | 656       | 37.9           | 17.8     | 32      |
| GKPSTHNIFGSAQTVNTATYSIIK                                   | WSLALIHMIHKQR            | 486       | 640       | 32.6           | 17.4     | 8       |
| TKIQSBLHR                                                  | KHGGMTLEQK               | 585       | 656       | 31.8           | 50.5     | 0       |
| IKDAVR                                                     | VLHNSLLLLDDFQDNSPLR      | 460       | 469       | 31.1           | 13.6     | 8       |
| IKDAVR                                                     | VLHNSLLLLDDFQDNSPLRR     | 460       | 470       | 28.6           | 14.9     | 8       |
| GKPSTHNIFGSAQTVNTATYSIIK                                   | KHGGMTLEQK               | 495       | 656       | 24.8           | 13.0     | 24      |
| AVLEAPYDYIASMPKSGVR                                        | IKDAVR                   | 434       | 460       | 24.5           | 13.6     | 8       |
| GKPSTHNIFGSAQTVNTATYSIIK                                   | QKGFBEDLDEGK             | 486       | 619*      | 18.4           | 17.1     | 10      |
| VLHNSLLLLDDFQDNSPLRR                                       | GKPSTHNIFGSAQTVNTATYSIIK | 480       | 486       | 17.3           | 10.3     | 8       |

| Peptide 1                                        | Peptide 2                    | Abs<br>Pos 1 | Abs<br>Pos 2 | Relative<br>Score | Dist<br>(Å) |
|--------------------------------------------------|------------------------------|--------------|--------------|-------------------|-------------|
| <b>(b) Cyclase-Cyclase Cross Links</b>           |                              |              |              |                   |             |
| FVELAKYIPYR                                      | FVELAKYIPYR                  | 183          | 183          | 83.9              | n/a         |
| YNPDVSNKTQLEWM                                   | YNPDVSNKTQLEWM               | 334          | 334          | 71.7              | n/a         |
| SKFTTLEDR                                        | YNPDVSNKTQLEWMR              | 28           | 334          | 64.3              | 19.1        |
| KLIVEYVAK                                        | YNPDVSNKTQLEWMR              | 276          | 334          | 61.3              | 37.4        |
| FVEVGSSR                                         | FVELAKYIPYR                  | 171*         | 183          | 54.8              | 16.7        |
| FVELAKYIPYR                                      | YNPDVSNKTQLEWMR              | 183          | 334          | 51.1              | 44.0        |
| TTMKSWAR                                         | FVEVGSSR                     | 160          | 171*         | 41.1              | 17.7        |
| TTMKSWAR                                         | FVELAKYIPYR                  | 160          | 187          | 27.0              | 21.2        |
| QHETR                                            | FVELAKYIPYR                  | 176          | 183          | 26.9              | 10.3        |
| FVEVGSSR                                         | YNPDVSNKTQLEWMR              | 171*         | 334          | 24.5              | 33.2        |
| TTMKSWAR                                         | FVELAKYIPYR                  | 160          | 183          | 14.1              | 27.7        |
| <b>(c) Cyclase-Prenyltransferase Cross-Links</b> |                              |              |              |                   |             |
| KSKFTTLEDR                                       | TKIQSBLHR                    | 27           | 585          | 74.0              | 28.4        |
| FVEVGSSR                                         | TKIQSBLHR                    | 171*         | 585          | 67.8              | 50.5        |
| KLIVEYVAK                                        | TKIQSBLHR                    | 276          | 585          | 67.2              | 41.3        |
| TKIQSBLHR-TTMKSWAR                               | TKIQSBLHR                    | 160          | 585          | 65.2              | 26.7        |
| TKIQSBLHR-SKFTTLEDR                              | TKIQSBLHR                    | 28           | 585          | 64.9              | 24.6        |
| YNPDVSNKTQLEWMR                                  | TKIQSBLHR                    | 334          | 584          | 60.6              | 25.0        |
| FVELAKYIPYR                                      | VPDVKVGK                     | 184          | 455          | 59.6              | 41.9        |
| FVELAKYIPYR                                      | TKIQSBLHR                    | 183          | 584          | 57.3              | 25.0        |
| YNPDVSNKTQLEWMR                                  | VPDVKVGK                     | 334          | 455          | 56.7              | 41.2        |
| FVELAKYIPYR                                      | AVLEAPYDYIASMPKGV            | 183          | 435          | 52.5              | 42.2        |
| IQSQLFLEMLAIDPEBAKTTMK                           | TKIQSBLHR                    | 156          | 584          | 50.2              | 23.7        |
| SKFTTLEDR                                        | VPDVKVGK                     | 28           | 455          | 42.7              | 50.9        |
| KLIVEYVAK                                        | VPDVKVGK                     | 276          | 455          | 42.0              | 45.2        |
| QHETR                                            | TKIQSBLHR                    | 176          | 585          | 41.5              | 19.3        |
| TTMKSWAR                                         | VPDVKVGK                     | 160          | 455          | 32.5              | 43.3        |
| FVELAKYIPYR                                      | VGKIK                        | 183          | 458          | 22.7              | 42.4        |
| <b>(d) Cross Links in Linker Region*</b>         |                              |              |              |                   |             |
| YNPDVSNKTQLEWMR                                  | SPEIDSDAVSPTADESDSTEDSLGSGSR | 334          | 356          | 64.6              |             |
| QDSSLSTGLSLSPVHSNEGKDLQR                         | QFVLDIIIEEKSLDYTR            | 405          | 681          | 63.1              |             |
| YNPDVSNKTQLEWMR                                  | QGLPSLESBPVLAR               | 334          | 349          | 58.0              |             |
| QDSSLSTGLSLSPVHSNEGKDLQR                         | TKIQSBLHR                    | 405          | 585          | 54.3              |             |
| FVELAKYIPYR                                      | QDSSLSTGLSLSPVHSNEGKDLQR     | 183          | 405          | 49.1              |             |

|                                         |                                         |     |     |      |
|-----------------------------------------|-----------------------------------------|-----|-----|------|
| QDSSLSTGLSLSPVHSNEG <b>K</b> DLQR       | WSLALIHMIH <b>K</b> QR                  | 405 | 640 | 46.9 |
| QDSSLSTGLSLSPVHSNEG <b>K</b> DLQR       | <b>S</b> HMALLNVLSTGR                   | 405 | 643 | 46.7 |
| QDSSLSTGLSLSPVHSNEG <b>K</b> DLQR       | VDTDHIFFE <b>K</b> AVLEAPYDIASMPK       | 405 | 419 | 44.2 |
| YNPDVSVFN <b>K</b> TQLEWMR              | QDSSLSTGLSLSPVHSNEG <b>K</b> DLQR       | 334 | 405 | 41.8 |
| QGLP <b>S</b> LESBPVLAR                 | <b>T</b> KIQSBLHR                       | 346 | 585 | 41.8 |
| KS <b>K</b> FTTLEDR                     | <b>S</b> PEIDSDES AVSPTADESDSTEDSLGSGSR | 29  | 356 | 41.2 |
| QGLPSLE <b>S</b> BPVLAR                 | QDSSLSTGLSLSPVHSNEG <b>K</b> DLQR       | 349 | 405 | 40.6 |
| <b>S</b> PEIDSDES AVSPTADESDSTEDSLGSGSR | <b>T</b> KIQSBLHR                       | 356 | 585 | 34.4 |
| <b>S</b> PEIDSDES AVSPTADESDSTEDSLGSGSR | <b>K</b> HGGMTLEQK                      | 356 | 656 | 30.8 |
| QDSSLSTGLSLSPVH <b>S</b> NEGKDLQR       | <b>G</b> KPSTHNIFGSAQTVNTATYSIIK        | 401 | 486 | 30.4 |
| QDSSLSTGLSLSPVH <b>S</b> NEGKDLQR       | VPDV <b>K</b> VGK                       | 401 | 455 | 27.0 |
| KS <b>K</b> FTTLEDR                     | QGLPSLE <b>S</b> BPVLAR                 | 29  | 349 | 15.1 |
| QDSSLSTGLSLSPVHSNEG <b>K</b> DLQR       | <b>I</b> KDAVR                          | 405 | 460 | 11.7 |

\* Disordered in structure

Crosslinked amino acids are indicated in bold red letters. The absolute position numbering of each crosslink corresponds to the amino acid sequence of PaFS. Relative scores are derived from MeroX, normalized to the highest score. The FDR confidence levels derive from the MeroX search results. Raw MeroX scores, along with measured m/z, charge, experimental mass, theoretical mass, and mass error in ppm are provided in Supplementary Data 1. MeroX search details and parameters are given in the Methods. An asterisk (\*) indicates that the crosslinked residue is disordered in the atomic coordinates, and the listed distance is reported from integrative modeling. (a) Observed prenyltransferase-prenyltransferase crosslinks. Crosslink distances were measured using the structural model of the prenyltransferase domain (PDB 7JTH) reported in this study, and distances between C $\alpha$  atoms of identified residues are listed under the column header Dist (Å). In the octameric prenyltransferase domain, since many intermolecular interactions are possible per crosslink, the number of satisfactory distances (within 35 Å) that were measured are listed under column header # meas. (b) Observed cyclase-cyclase crosslinks. Crosslink distances were measured using the structural model of the cyclase domain (PDB 5ERM) determined by X-ray crystallography, and distances between C $\alpha$  atoms of identified residues are listed under the column header Dist (Å). (c) Cyclase-prenyltransferase crosslinks. Inter-domain crosslink distances were measured using the prenyltransferase octamer model (PDB 7JTH), with a model of the cyclase domain (PDB 5ERM) docked into low-resolution cryo-EM density according to best fit in Chimera (manual fitting of domains into cryo-EM maps and measured crosslinks are shown in Supplementary Fig. 14d). Distances were calculated between C $\alpha$  atoms and are listed under column header Dist (Å). (d) Crosslinks involving residues in the linker segment (residues 345-413 in the amino acid sequence).

**Supplementary Table 4. Integrative modeling analysis and statistics.**

| Analyses |                               | Score Distribution |                  |                    | Sampling Precision Statistics |            |                          |                        | Gaussian Mixture Models |           |                                  |
|----------|-------------------------------|--------------------|------------------|--------------------|-------------------------------|------------|--------------------------|------------------------|-------------------------|-----------|----------------------------------|
| EM Map   | XL-MS satisfaction cutoff (Å) | K-S test D         | K-S test p-value | Number of Clusters | P-value                       | Cramer's V | Clustered Population (%) | Sampling Precision (Å) | Number of GMMs          | Threshold | Chimera Cross-Correlation Coeff. |
| SE_A     | 50                            | 0.018              | 1                | 15                 | 0                             | 0.097      | 93.1                     | 28.4                   | 200                     | 0.015     | 0.99                             |
| SE_B     | 50                            | 0.011              | 1                | 7                  | 0                             | 0.084      | 98.5                     | 37.2                   | 200                     | 0.015     | 0.98                             |
| SE_C     | 50                            | 0.017              | 1                | 8                  | 0                             | 0.08       | 96.1                     | 34.3                   | 200                     | 0.015     | 0.99                             |
| Cap      | 50                            | 0.03               | 0.01             | 11                 | 0.015                         | 0.047      | 93.1                     | 28.3                   | 200                     | 0.025     | 0.99                             |

Simulations were conducted with Gaussian mixture models (GMMs) generated from input EM maps and XL-MS restraints to a 50 Å distance. The Kolmogorov-Smirnov two-sample test was performed to ensure score distributions are similar if p-value > 0.05 or D < 0.30. Sampling precision was determined by three criteria: (1) p-value from  $\chi^2$  test for homogeneity of proportions > 0.05; (2) Cramer's V value for difference between the distributions in two samples < 0.10; (3) the population of clustered models after the removal of the cluster containing less than 10 models from either sample > 0.80. From those criteria, overall precision of simulation sampling ranges was estimated to range from 28 to 37 Å. GMMs from the densities were generated by the number of centers and threshold shown in the table. The models were evaluated through Chimera cross-correlation calculation.

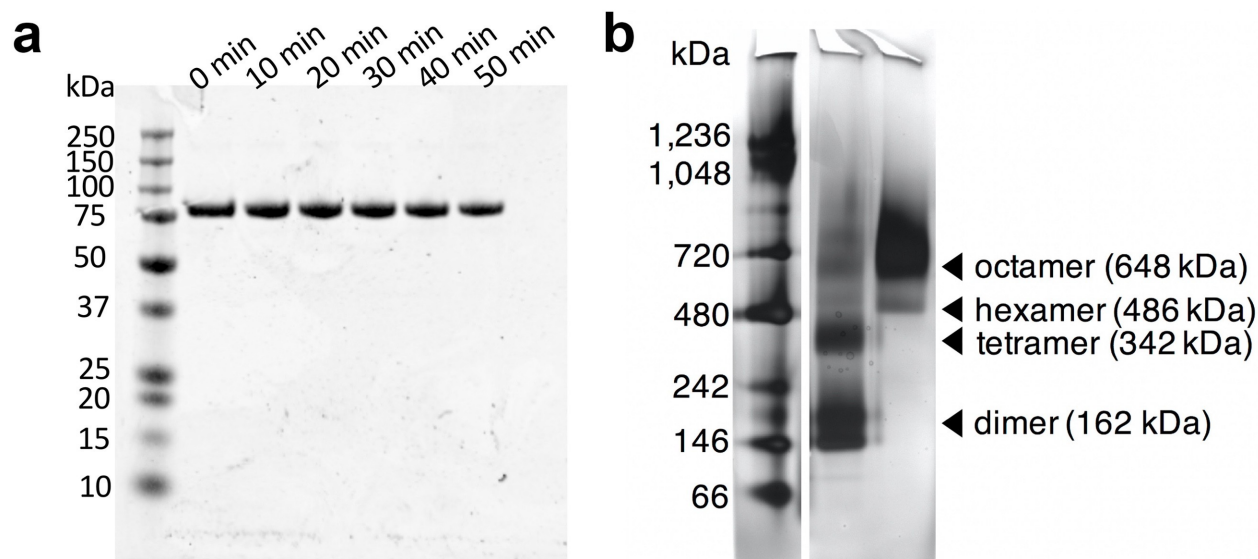

**Supplementary Fig. 1. (a)** Stability and activity of full-length PaFS. PaFS (2.0 mg/mL) was equilibrated at room temperature in EM buffer and 20- $\mu$ g aliquots were extracted every 10 min. SDS-PAGE analysis revealed that full-length PaFS (81 kD) remained intact for at least 50 min, the time interval between protein preparation and vitrification. No evidence for sample degradation was observed, thus verifying that EM and cryo-EM grids were prepared with pure and fully-intact PaFS. This time-course evaluation was conducted once, although PaFS at 81 kD on an SDS-PAGE is highly reproducible. **(b)** Native-PAGE with glycerol gradient fixation (GraFix). PaFS (61  $\mu$ M) in the presence and absence of 0.000–0.125% glutaraldehyde for fixation was subject to ultracentrifugation and fractionation (see Methods). Analysis by SDS-PAGE revealed that PaFS eluted at identical fractions both with and without glutaraldehyde, indicating that the density/molecular weight of PaFS is unchanged after cross-linking. Accordingly, identical fractions were taken from both the fixed and unfixed samples of PaFS and subjected to Native-PAGE, shown above. A total of 5  $\mu$ g of PaFS (0.3 mg/mL) of native protein (lane 2) and GraFix-stabilized protein (lane 3) were run against the standards in lane 1. The non-cross-linked PaFS sample exhibits oligomeric heterogeneity, with the more prominent bands corresponding to octamers, hexamers, tetramers, and dimers. This behavior is consistent with that recently observed for a different bifunctional terpene synthase, copalyl diphosphate synthase from *Penicillium verruculosum*,<sup>1</sup> suggesting that quaternary structure assembly is only weakly stabilized under the conditions of the Native-PAGE experiment. The cross-linked PaFS sample exhibits predominantly octameric quaternary structure, with a minor population of hexamer also observed. This is consistent with our observations by cryo-EM, and these results have been reproduced in two other independent experiments. Source data are provided as a Source Data file.



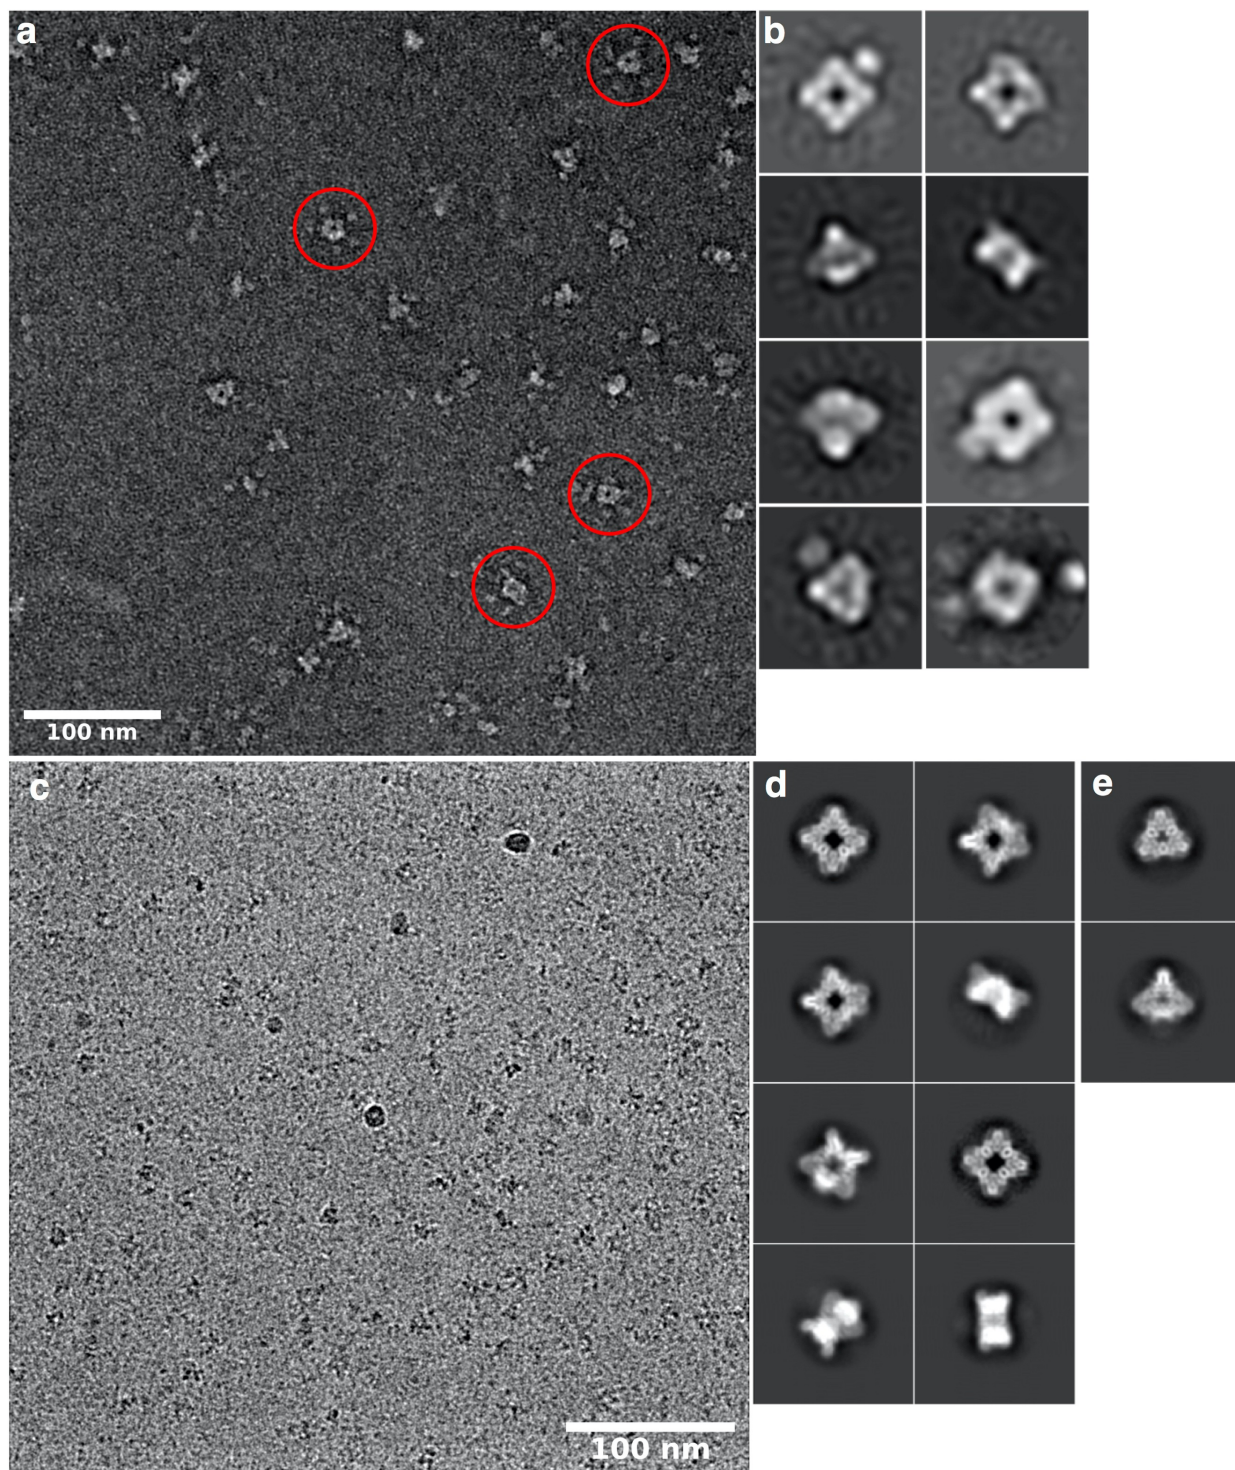

**Supplementary Fig. 2. Visualizing PaFS in raw micrographs and class averages.** (a) Representative negative stain electron micrograph of PaFS with scale bar indicating 100 nm. Micrograph is representative of a dataset of 102 collected micrographs from one grid; similar and reproducible results were obtained from independent preparation of two other grids. Selected satellites surrounding central octamers are highlighted by red circles. (b) 2D class averages of PaFS octamers and hexamers from negative stain EM data. Satellite domains are evident in some of these reconstructions. (c) Representative cryo-EM micrograph of PaFS with scale bar indicating 100 nm. Micrograph is representative and results are reproducible across a dataset of 1550 collected movies. (d) 2D class averages of the PaFS octamer from cryo-EM data. (e) 2D class average of the PaFS hexamer from cryo-EM data.

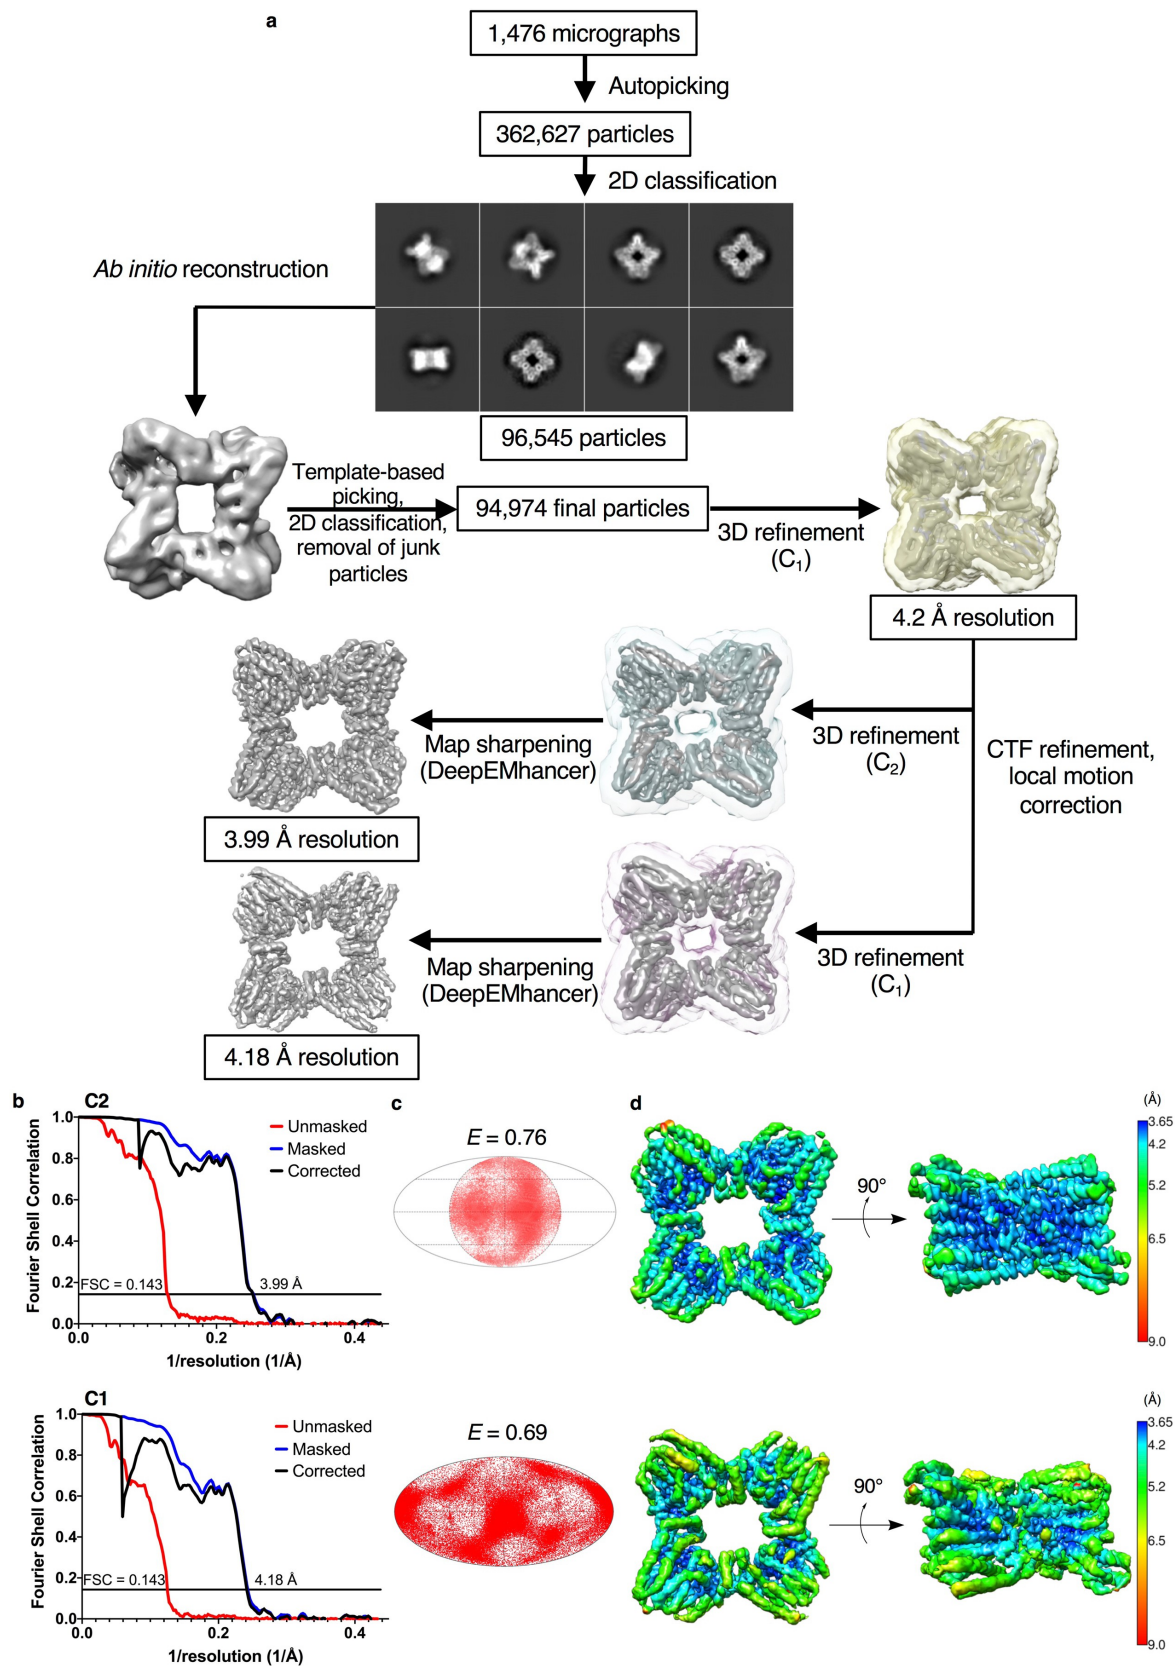

**Supplementary Fig. 3. Workflow for cryo-EM structure determination of PaFS.** (a) A total of 1,476 out of 1,550 micrographs were chosen based on motion and contrast transfer function (CTF) assessment in cryoSPARC. Autopicking, ab initio model reconstruction, 3D refinement, CTF refinement, and local motion correction were conducted in cryoSPARC. Map sharpening was performed with DeepEMhancer. (b) Fourier shell correlation (FSC) plots for unmasked (red), masked (blue), and corrected (black) maps calculated in cryoSPARC, for maps calculated with C2 (top) and C1 (bottom) symmetry. Resolution estimate at 0.143 FSC is highlighted for the corrected map. (c) Angular distribution spherical plots of data used in reconstruction of C2 (top) and C1 (bottom) maps. Efficiencies were calculated in cryo-EF and are listed as *E*. (d) Local resolution maps of PaFS prenyltransferase reconstructions calculated with C2 (top) and C1 (bottom) symmetry. Local resolution is depicted according to the scale shown in Å at 0.5 FSC. Maps calculated with cryoSPARC and contoured at 0.141 using Chimera.

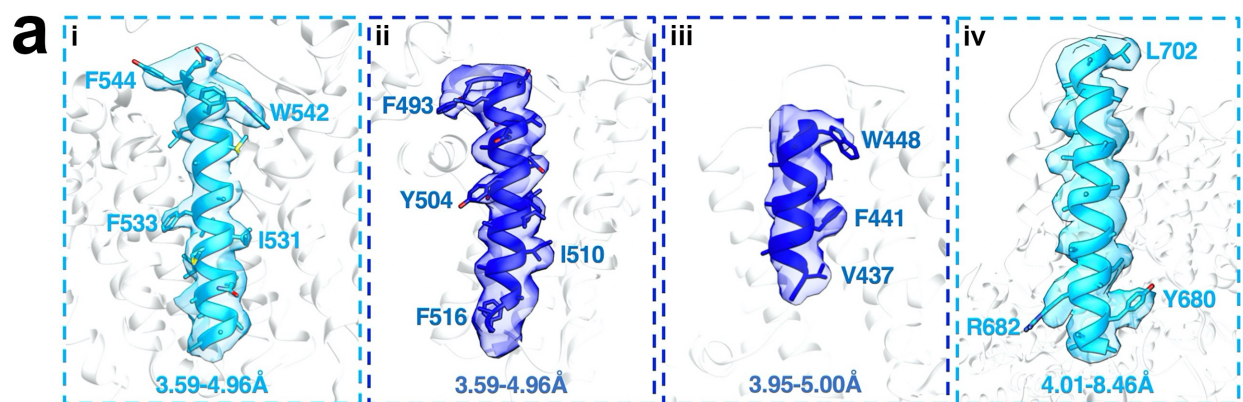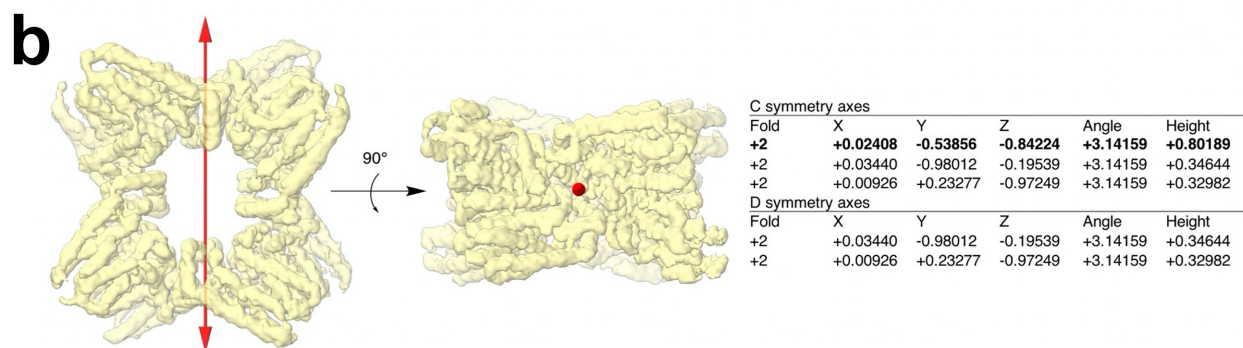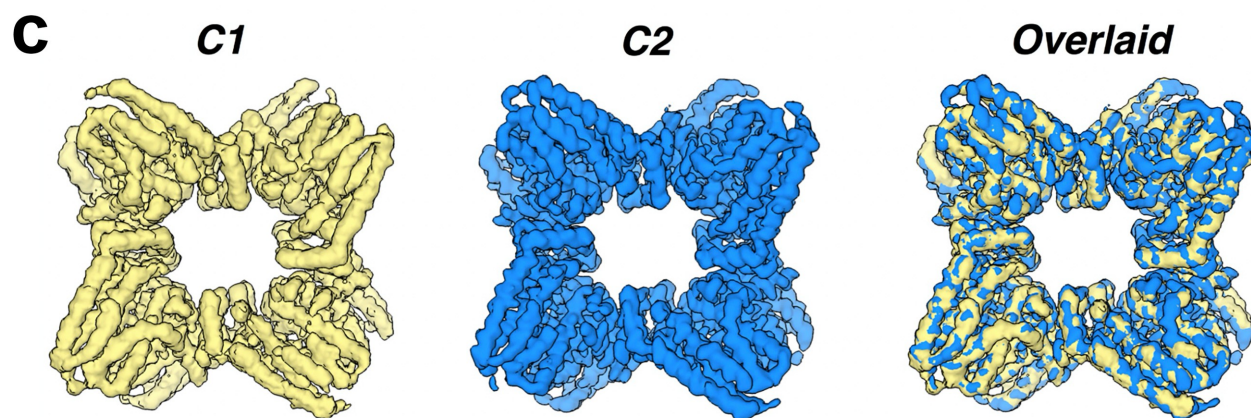

**Supplementary Fig. 4.** (a) Examples of density maps of the PaFS prenyltransferase. All maps are contoured at 0.0755 using Chimera, and local resolution ranges are indicated: (i) helix in chain A buried at the AB dimer interface; (ii) helix in chain B buried at the AB dimer interface; (iii) a solvent-exposed helix in chain A; (iv) a solvent-exposed helix in chain B. (b) Unbiased symmetry axis determination using proSHADE. The sharpened map of the PaFS transferase octamer solved with C1 symmetry to 4.18 Å resolution (Supplementary Fig. 3) was evaluated for unbiased symmetry axis determination using proSHADE. The most probable symmetry axis detected is indicated by a red arrow, corresponding to the parameters highlighted in boldface in the accompanying table. Weaker signals for other C2 and D2 symmetry axes are also identified. (c) Comparison of C1 and C2 reconstructions. A reconstruction of the PaFS octamer without symmetry expansion was resolved to 4.18 Å resolution (khaki), while refinement with C2 symmetry imposed yielded a reconstruction to 3.99 Å resolution (blue). Symmetric and asymmetric reconstructions can be superimposed with a correlation of 0.88 determined in Chimera. Maps contoured at 0.141 in Chimera.

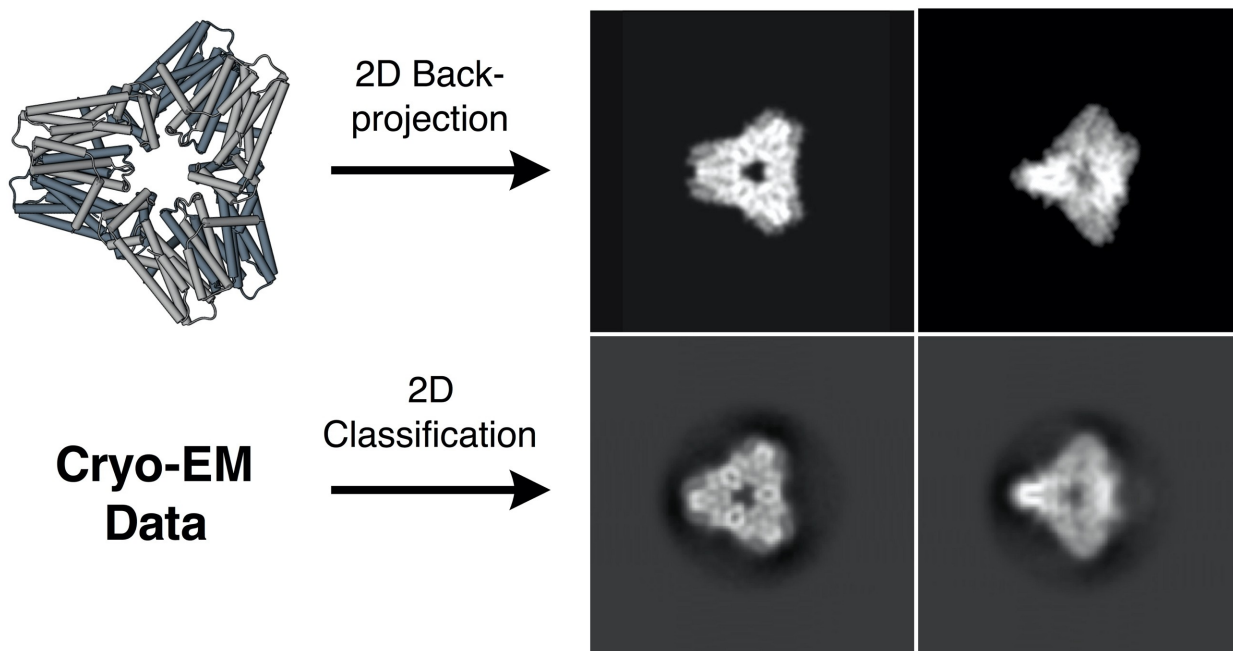

**Supplementary Fig. 5. Crystal structure comparison with 2D class averages.** The 2D back-projections of the PaFS prenyltransferase hexamer generated from the X-ray crystal structure (PDB 5ERN) low-pass filtered to 8 Å (top) display structural similarities with 2D class averages generated from cryo-EM experimental data (bottom). A satisfactory 3D reconstruction of the PaFS prenyltransferase hexamer from cryo-EM data could not be achieved due to an insufficient number of particles.

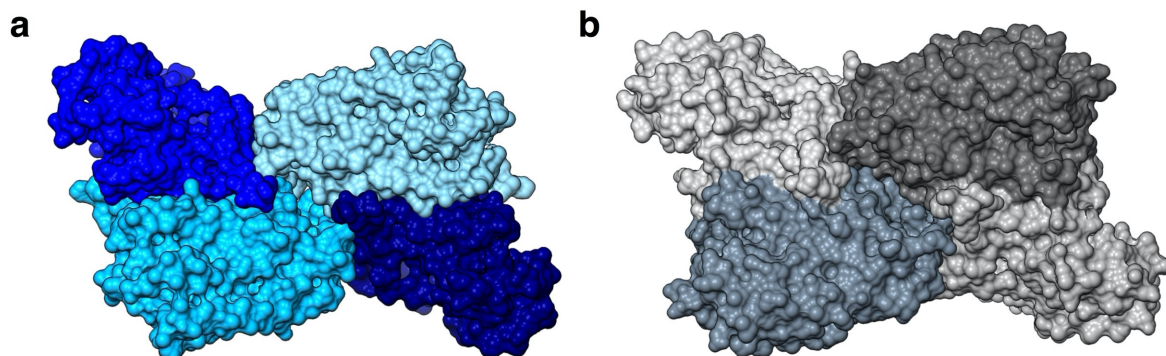

**Supplementary Fig. 6. Comparison of side-views of octameric and hexameric PaFS prenyltransferases.** (a) The interface of two dimers in the octamer, i.e., the tetramer of dimers, as observed in the cryo-EM structure. The cyan and dark blue monomers on the left comprise one AB dimer (listed as chain A and chain B in the atomic coordinates), and the blue and arctic blue monomers on the right comprise the A'B' dimer (listed as chain C and chain D, respectively, in the atomic coordinates) (PDB 7JTH). The AB-A'B' dimer-dimer interface has a buried surface area of 1012 Å<sup>2</sup>; the other dimer-dimer interfaces (not shown) are similar but not identical with buried surface areas of 1013 Å<sup>2</sup>, 1090 Å<sup>2</sup>, and 1208 Å<sup>2</sup>. (b) The corresponding dimer-dimer interface in the X-ray crystal structure of the hexamer (PDB 5ERN) is larger, with a total buried surface area of 1472 Å<sup>2</sup>.

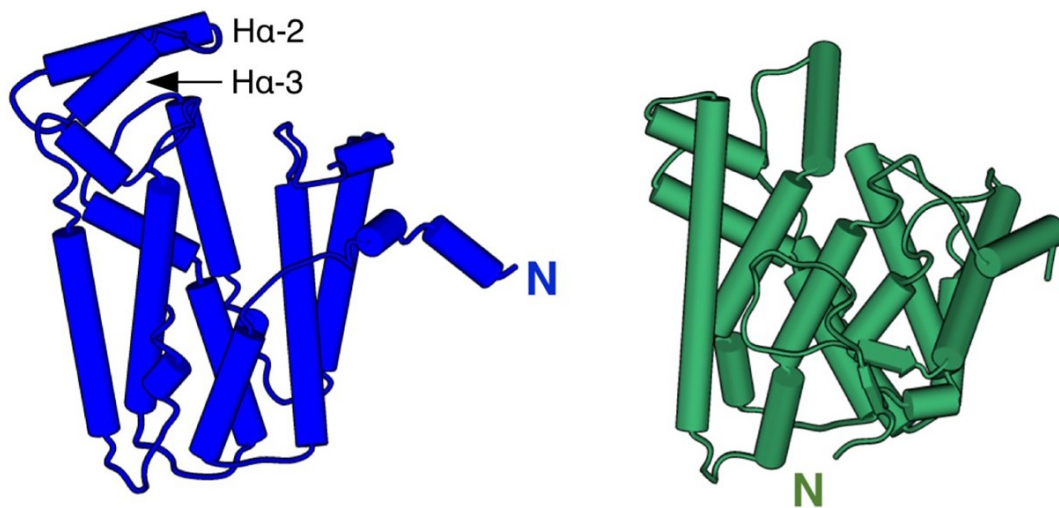

**Supplementary Fig. 7. Comparison of the PaFS prenyltransferase and cyclase domains.** Side-by-side comparison of the PaFS prenyltransferase (blue, PDB 5ERN) and cyclase (green, PDB 5ERM) domains highlights structural features that distinguish the two protein structures. In particular, the distinctive H $\alpha$ -2 and H $\alpha$ -3 helices that cap the active site of the prenyltransferase are absent in the cyclase.

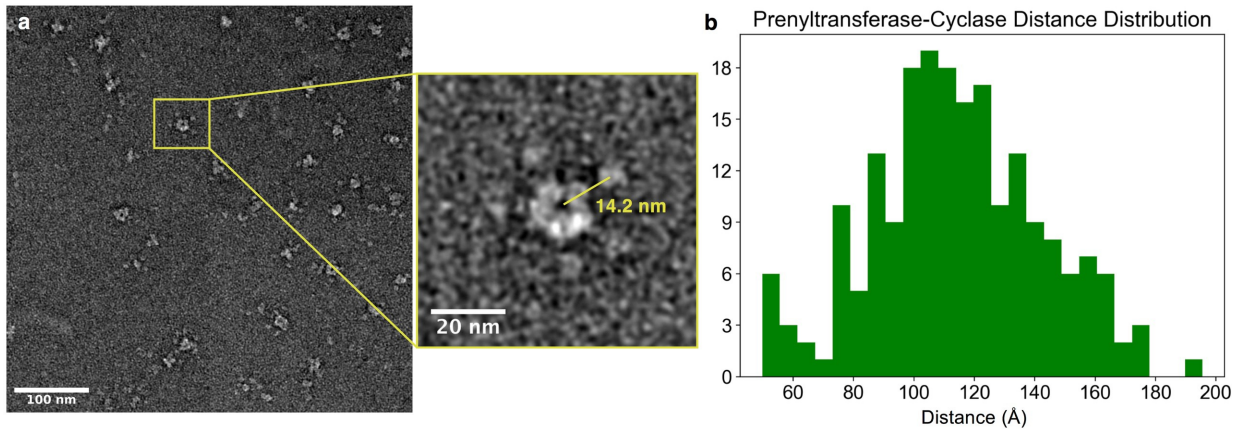

**Supplementary Fig. 8. (a)** Representative negative stain electron micrograph of PaFS with scale bar indicating 100 nm as shown in Supplementary Fig. 2a. Micrograph is representative of a dataset of 102 collected micrographs from one grid, and similar results were obtained from independent preparation of two other grids. Magnified region of micrograph displays a single particle with a representative distance measurement shown between the center of the octameric core and the center of a pendant cyclase domain; the scale bar indicates 20 nm. **(b)** Distribution of 202 prenyltransferase core–cyclase distances measured in negative stain electron micrographs. It was often difficult to distinguish prenyltransferase octamers from occasional hexamers in the micrographs due to low resolution. Measurements were made on prenyltransferases oriented such that the central pore was clearly visible; distances reported are from the center of the pore to the center of splayed-out cyclase domains, initially measured in pixels and then translated to Å. The average distance is  $114 \pm 28$  Å (standard deviation); the minimum distance measured is 54 Å and the maximum distance measured is 196 Å. Source data are provided as a Source Data file.



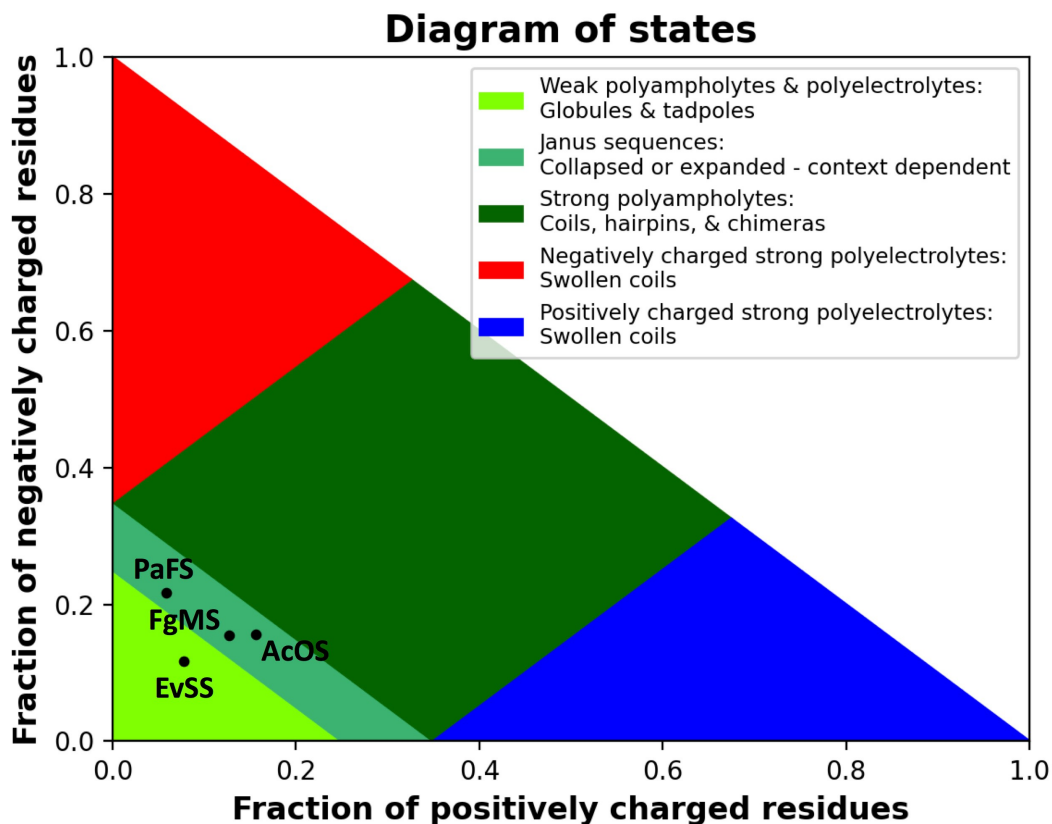

**Supplementary Fig. 9. Structural classification of intrinsically disordered polypeptide linkers in bifunctional terpene synthases.** The interdomain linkers in PaFS (fusicoccadiene synthase), FgMS (mangicdiene synthase), and AcOS (ophiobolin F synthase) are classified as Janus sequences that can adopt collapsed or expanded conformations depending on the context of the linkers. The interdomain linker in EvSS (stellatatriene synthase) is classified as a globule. Sequence analyses were performed using localCIDER.<sup>2</sup>

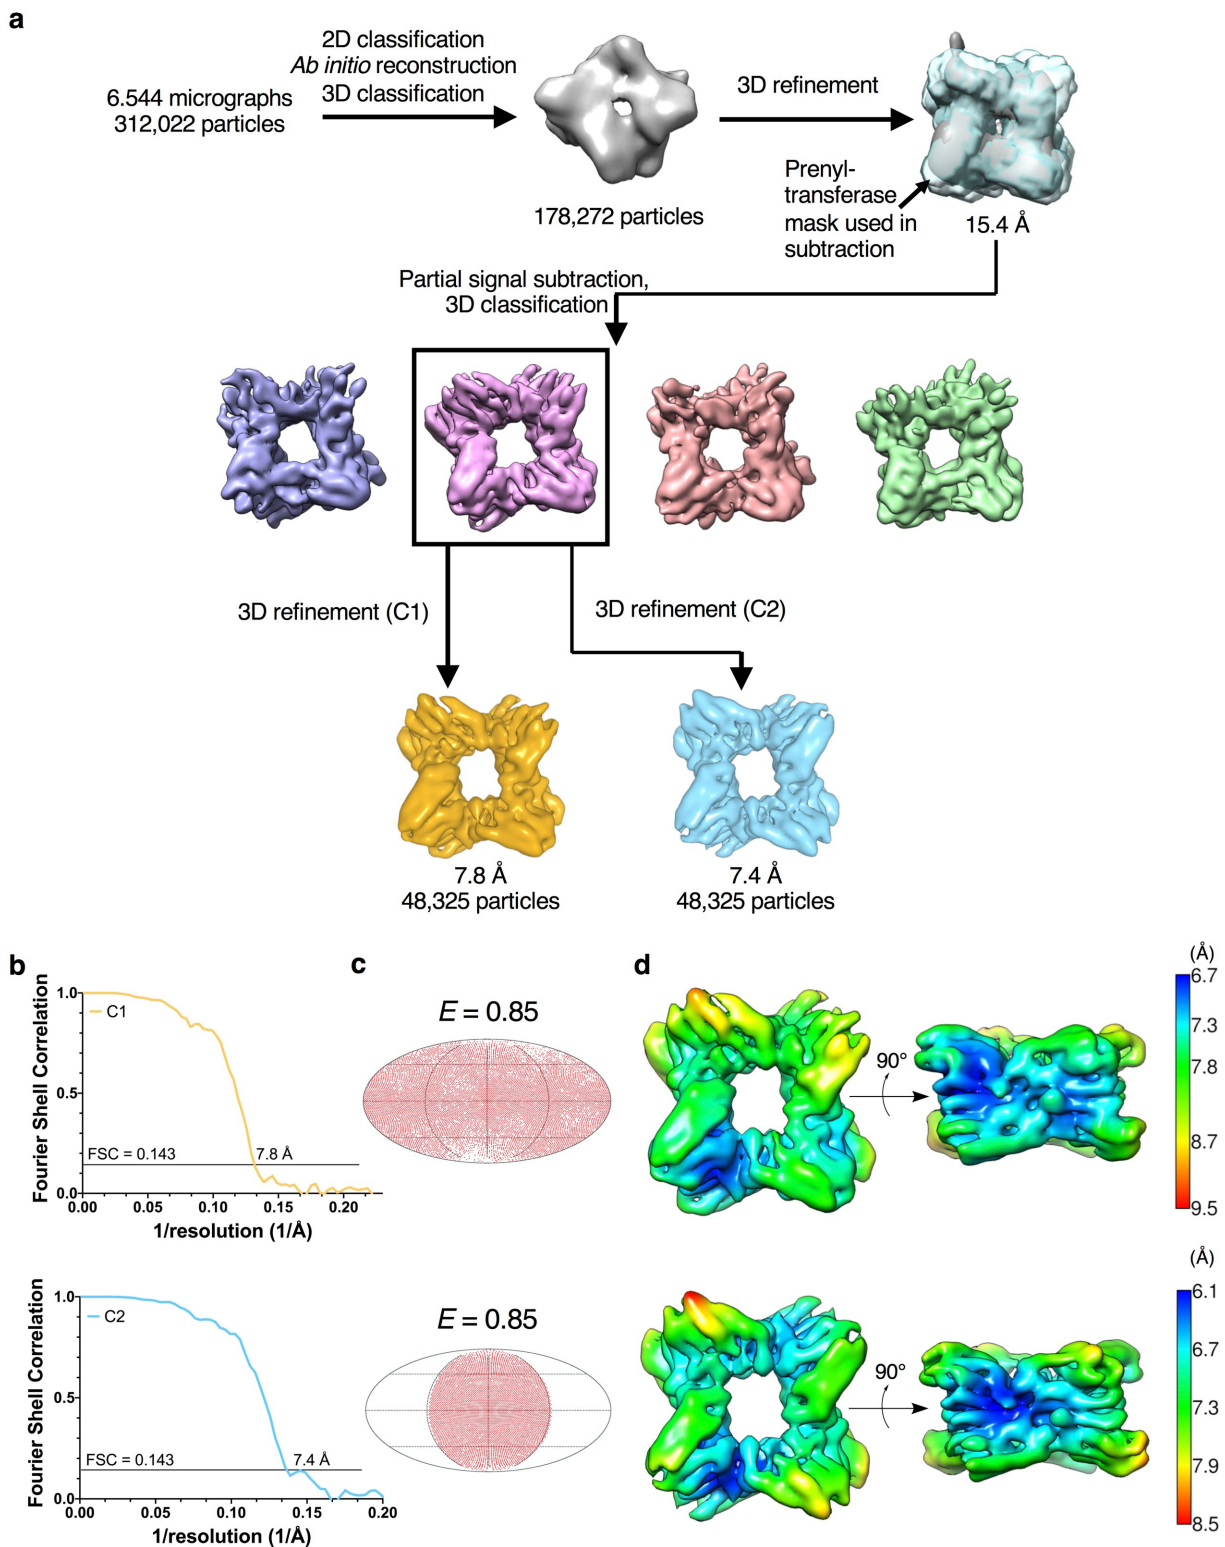

**Supplementary Fig. 10. Workflow for cryo-EM structure determination of cross-linked PaFS prenyltransferase octamer.** Particle picking was conducted using cryoSPARC; all other processing was performed with Relion. **(a)** Workflow of partial signal subtraction and masked classification used to obtain reconstruction of the PaFS octameric core. Partial signal subtraction was performed using the mask

shown surrounding the octameric core, where only density within the mask was retained. Masked 3D classification was conducted using the same mask used in subtraction. Particles from one selected class (48,325 particles) were refined with either C1 or C2 symmetry imposed to yield a reconstruction at 7.8 Å and 7.4 Å resolution, respectively. **(b)** FSC plots for maps calculated with C1 (top) and C2 (bottom) symmetry. Resolution estimates are indicated at 0.143 FSC. **(c)** Angular distribution spherical plots of data used in respective reconstructions. Efficiencies were calculated in cryo-EF and are listed as *E*. **(d)** Local resolution maps of respective reconstructions. Local resolution is depicted according to the scale shown in Å at 0.5 FSC. Maps calculated with Relion and contoured at 0.0529 (C1) and 0.0583 (C2) using Chimera.

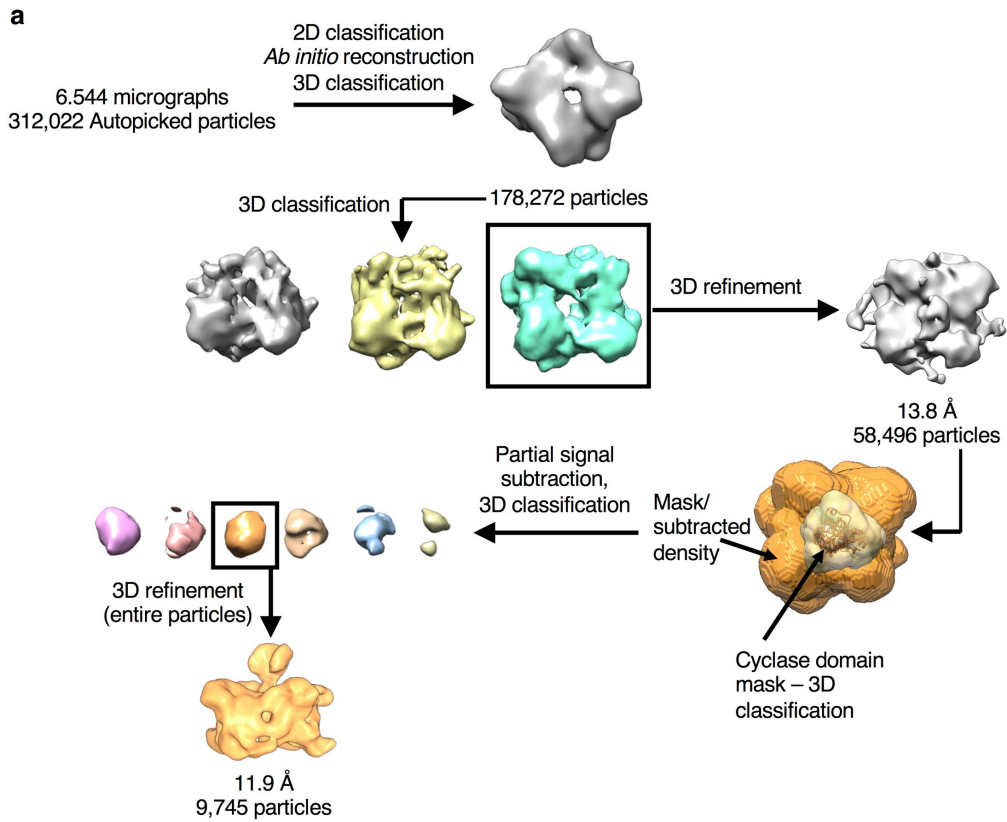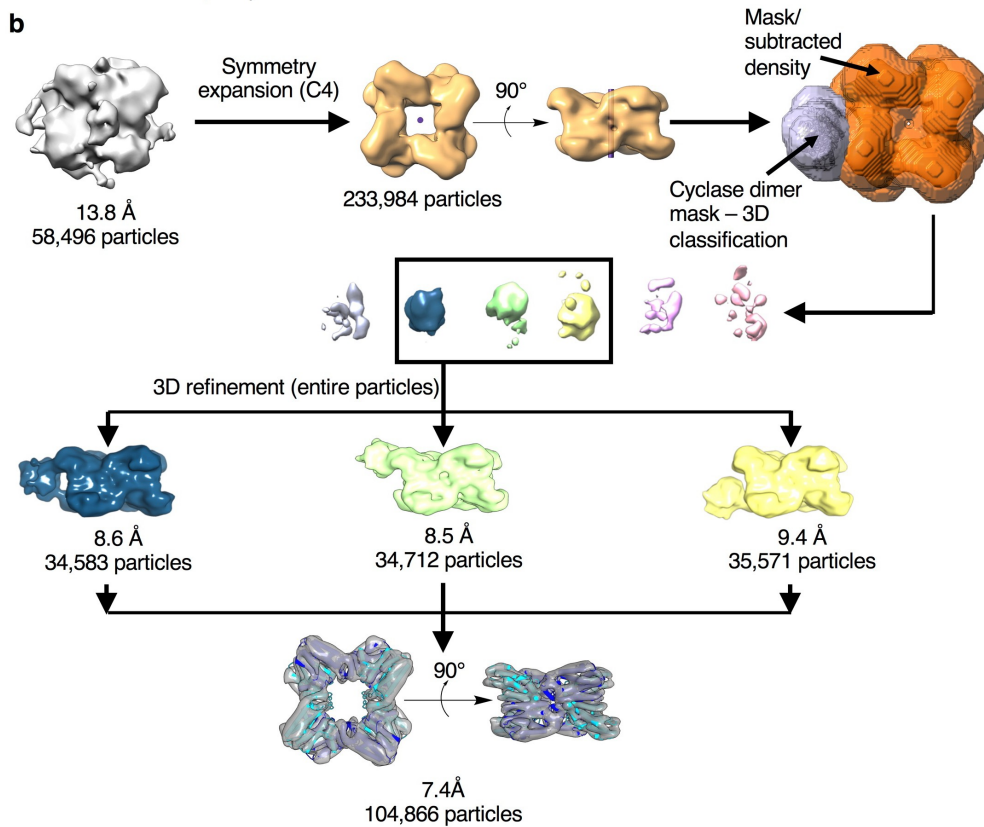

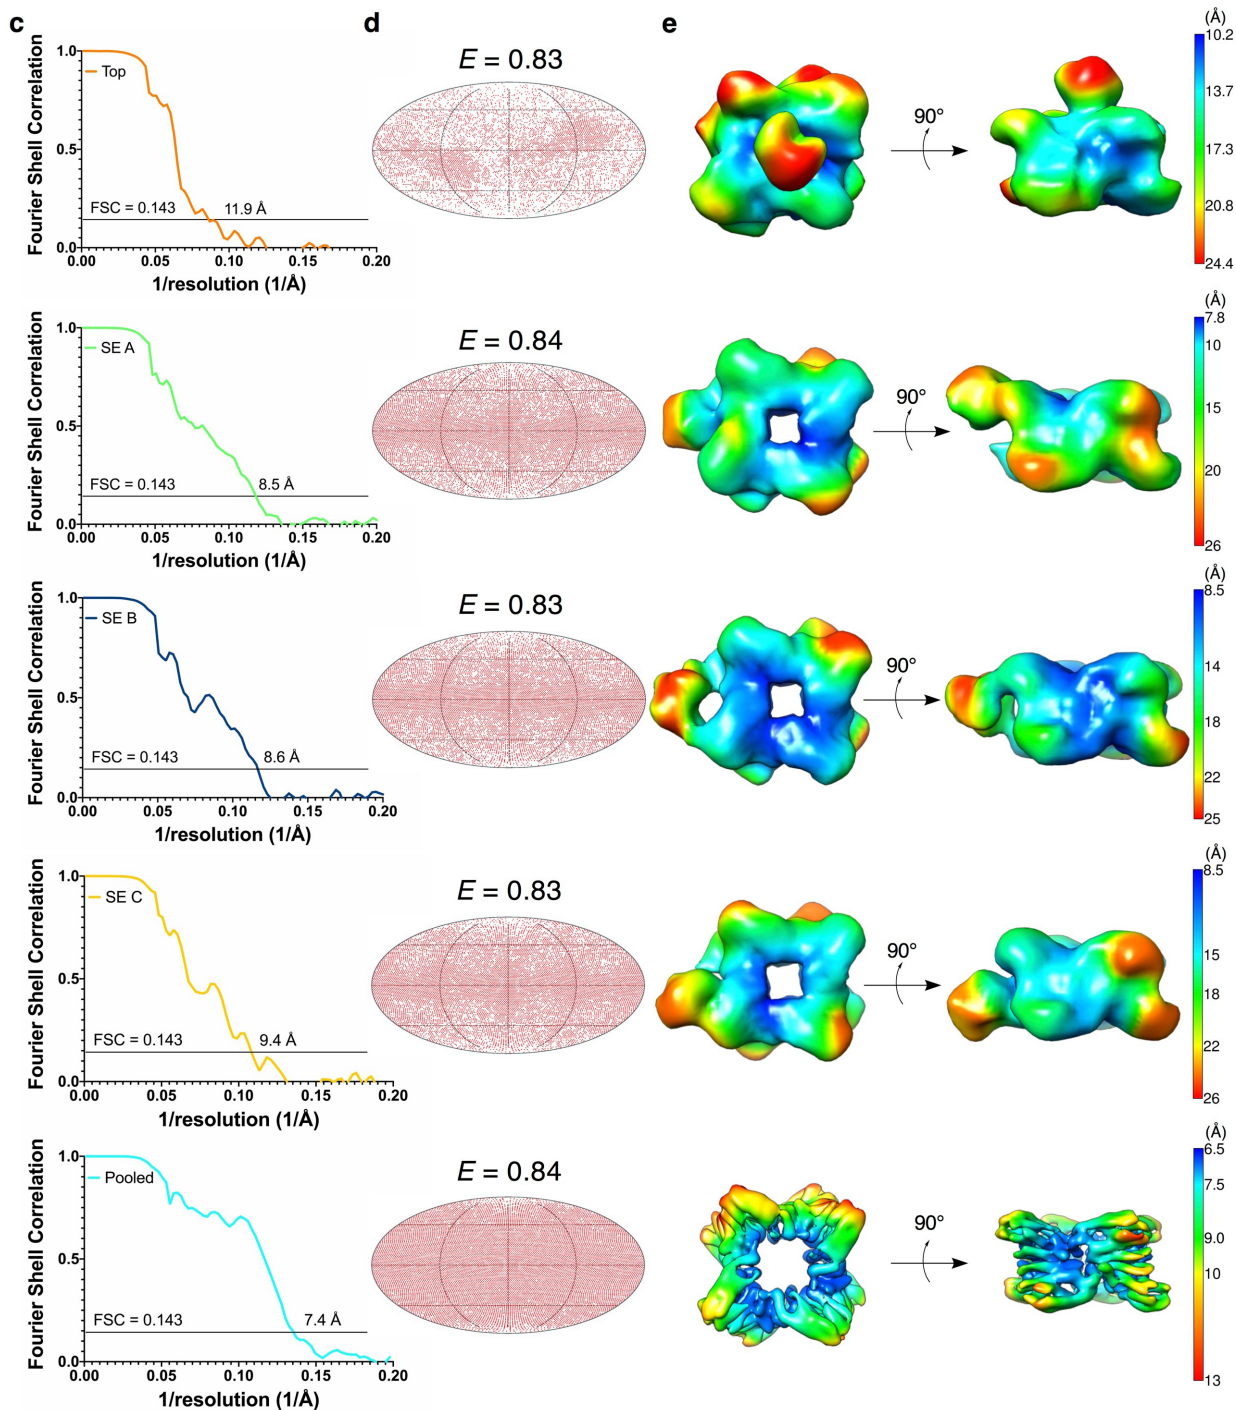

**Supplementary Fig. 11. Workflow for cryo-EM structure determination of cross-linked PaFS.**

Particle picking was conducted using cryoSPARC; all other processing was performed with Relion.

(a) Workflow of partial signal subtraction and masked classification used to obtain the reconstruction of the octameric prenyltransferase core of PaFS with a capping cyclase domain. After 3D classification and removal of junk particles, initial refinements of PaFS show converging density that capped the central pore. Partial signal subtraction was conducted using the mask shown surrounding the octameric core. Masked alignment free 3D classification was conducted using a mask calculated from the crystal structure of a cyclase domain (PDB 5ER8, chain A) modeled on top of the central pore. Entire particles from one

selected class (9,745 particles) were refined to yield a reconstruction of the prenyltransferase octamer with a cyclase domain capping the central pore. **(b)** Workflow of symmetry expansion, particle subtraction, and masked classification used to obtain reconstructions of the PaFS octameric core with peripheral cyclase domains. Particles were refined with imposed C4 symmetry, yielding the map shown; particles were then symmetry-expanded about the displayed C4 axis to yield 233,984 particles. Partial signal subtraction was then conducted using the mask shown surrounding the octameric core. Alignment free 3D classification was performed using a mask calculated from the crystal structure of the cyclase domain dimer (PDB 5ER8) modeled on the side of the central pore as shown. Entire particles from three selected classes were refined to yield symmetry-expanded (SE) reconstructions A, B, and C of the PaFS octameric core with the cyclase domain at three different positions, to 8.5 Å, 8.6 Å, and 9.4 Å resolution, respectively. Particles from these three classes were then pooled together, and further 3D refinement yielded reconstruction at 7.4 Å resolution. **(c)** FSC plots for the map containing the capping cyclase domain; SE maps A, B, and C; and the map of pooled SE particles. Resolution estimates are indicated at 0.143 FSC. **(d)** Angular distribution spherical plots of data used in respective reconstructions. Efficiencies were calculated in cryo-EF and are listed as *E*. **(e)** Local resolution maps of respective reconstructions. Local resolution is depicted according to the scale shown in Å at 0.5 FSC. Maps calculated with Relion and contoured at 0.0321 (top), 0.0354 (SE A), 0.0308 (SE B), 0.0274 (SE C), and 0.0718 (pooled SE) using Chimera.

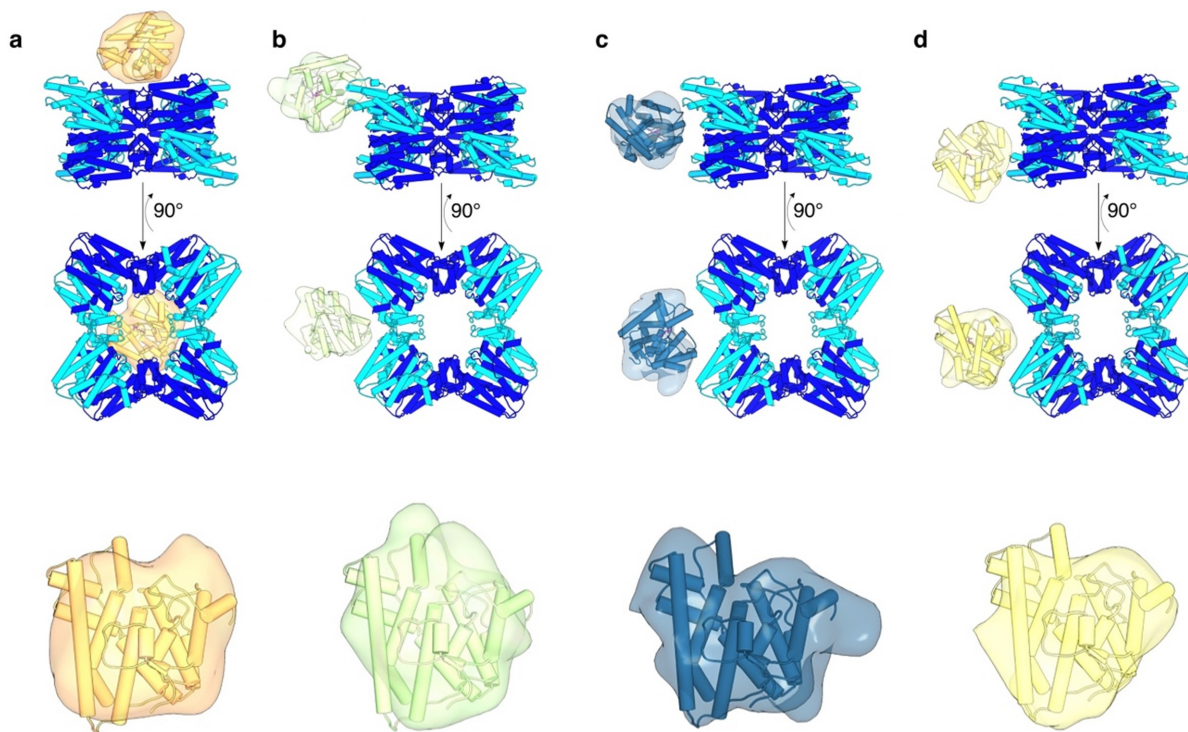

**Supplementary Fig. 12. Variable positions and orientations of PaFS cyclase domains.** Cryo-EM density of PaFS cyclase domains fit relative to the octameric prenyltransferase core. Density corresponding to each cyclase domain was tentatively fit with the crystal structure of the cyclase domain (PDB 5ER8, chain A, with bound ligand in the active site colored purple). Below each model is a close-up view of the cyclase domain fit into density, using a common orientation for each. **(a)** Density corresponding to one cyclase domain (contour 0.0191 in Chimera) caps the prenyltransferase octamer, modeled with the cyclase active site oriented toward the central pore. **(b)** Symmetry-expanded (SE) class A reveals density corresponding to one cyclase domain (contour 0.0132 in Chimera) positioned next to the prenyltransferase octamer. **(c)** SE class B shows density corresponding to one cyclase domain (contour 0.0172 in Chimera) positioned next to the prenyltransferase octamer, in a distinct position from classes A and C. **(d)** SE class C reveals density corresponding to one cyclase domain (contour in 0.0203 Chimera) positioned next to the prenyltransferase octamer, in a distinct position from classes A and B.

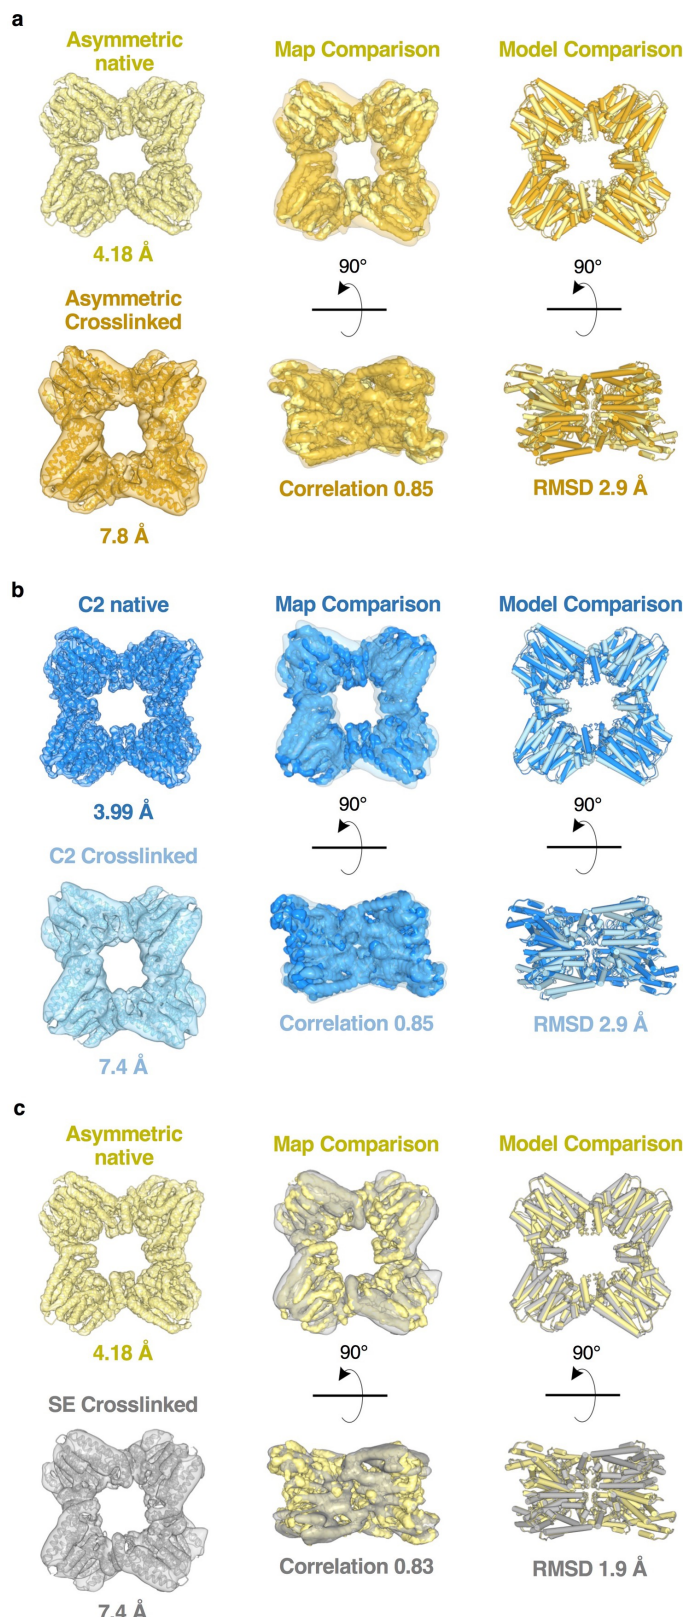



**Supplementary Fig. 13. Fit of PaFS non-crosslinked octamer into crosslinked octamer density. (a)** Comparison of asymmetric native reconstruction to asymmetric cross-linked reconstructions of the prenyltransferase core. Density for the octameric core in cross-linked PaFS (contour 0.0277 in Chimera) readily accommodates reconstruction of non-cross-linked PaFS (contour 0.141 in Chimera) with a correlation coefficient of 0.85. Atomic coordinates of the PaFS octamer fit into the cross-linked map chain-by-chain using Chimera yield an rmsd of 2.9 Å (2336 C $\alpha$  atoms). **(b)** Comparison of C2-symmetric native reconstruction to C2-symmetric cross-linked reconstructions of prenyltransferase core. Density for the cross-linked octameric core (contour 0.0277 in Chimera) again readily accommodates density for native octameric core (contour 0.141 in Chimera) with 0.85 correlation. Atomic coordinates of the PaFS octamer fit into the cross-linked map chain-by-chain yield an rmsd of 2.9 Å (2336 C $\alpha$  atoms). **(c)** Comparison of non-cross-linked, asymmetric prenyltransferase core and cross-linked, symmetry-expanded prenyltransferase core reconstructions. Consistent with results of reconstructions without symmetry expansion, density (contour 0.0395 in Chimera) readily accommodates that of non-cross-linked octameric core (0.83 correlation). When individual chains are fit into the density, comparison of native and crosslinked octamers yields an rmsd of 1.9 Å (2336 C $\alpha$  atoms).

**a** DSBU: Spacer arm = 12.5 Å

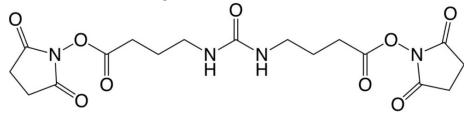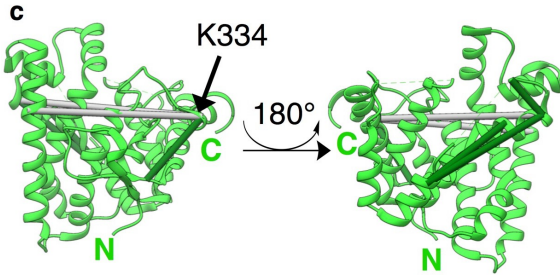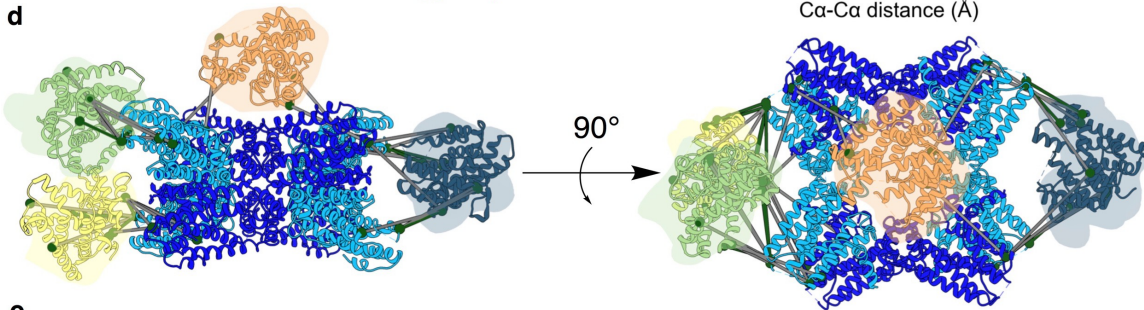

**b** Intra-Prenyltransferase Crosslinks

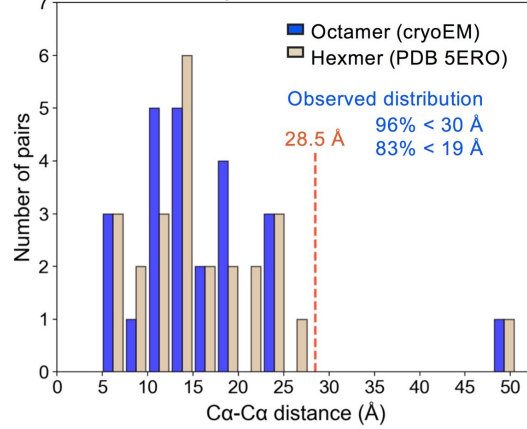

**e**

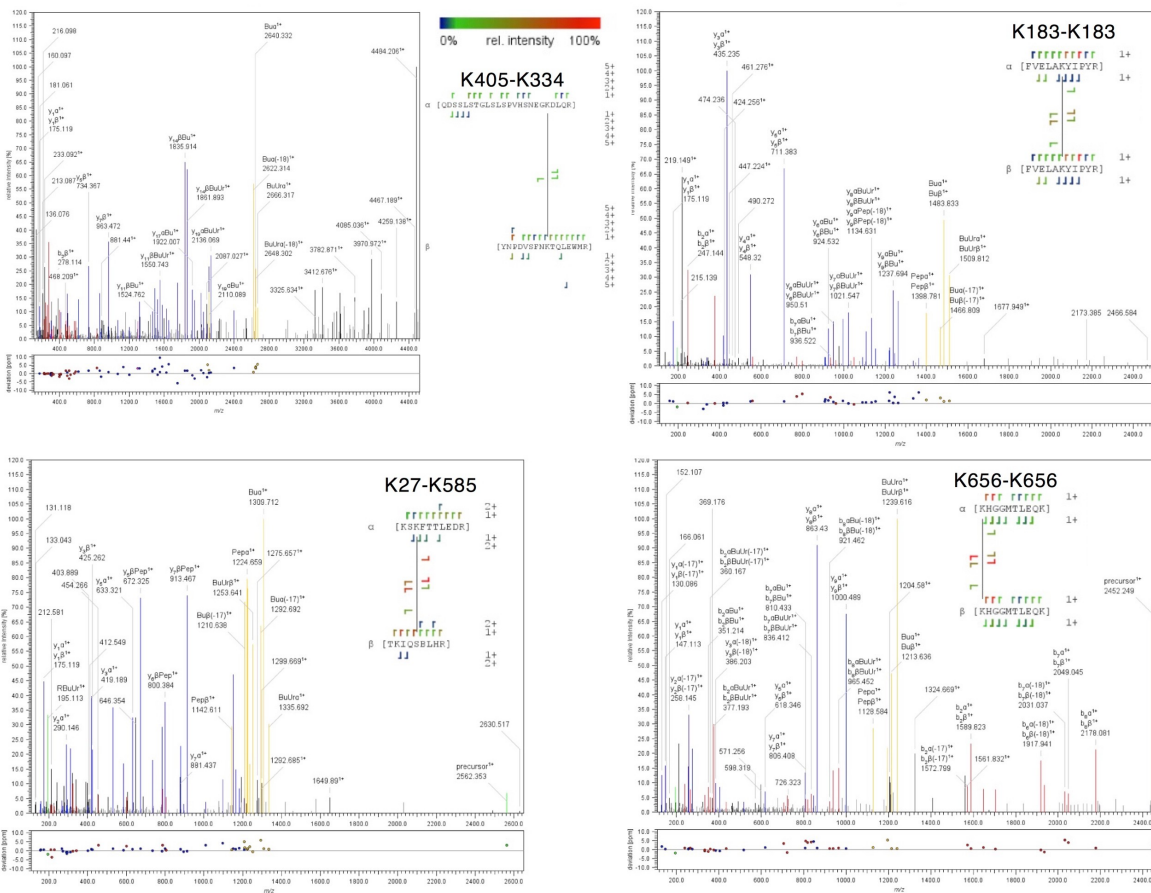

**Supplementary Fig. 14. Crosslinking mass spectrometry (XL-MS).** **(a)** Chemical structure of disuccinimidyl dibutyric urea (DSBU), the molecular crosslinker used for XL-MS studies. DSBU reacts with primary amines in lysine side chains as well as hydroxyl groups of serine, threonine, and tyrosine. These reactive groups must be within 12.5 Å, the length of the DSBU spacer arm. Adding twice the length of a lysine side chain (6-6.5 Å) plus estimated coordinate error for each mobile surface residue (1.5 Å) yields an approximate C $\alpha$ -C $\alpha$  distance cutoff of 28.5 Å. **(b)** C $\alpha$ -C $\alpha$  distance distribution of experimentally observed pairs in the PaFS prenyltransferase octamer (blue) and in the corresponding hexamer (tan). The approximate cross-link limit for DSBU of 28.5 Å is indicated by the dashed line; observed interactions falling below this limit (96% of observed pairs) are in agreement with the prenyltransferase octamer structure. **(c)** Intra-cyclase domain crosslinks modeled onto the crystal structure (PDB 5ERM, Chain A). Crosslinks within 30 Å are shown in dark green and longer than 30 Å in gray; such overlong crosslinks involve K334, which is adjacent to the flexible linker segment and may accordingly be more mobile in the full-length protein. **(d)** Model of the prenyltransferase octamer superimposed with the four cyclase domains positioned as shown in Fig. 3c. Selected interactions are modeled between cyclase and prenyltransferase domains with C $\alpha$  atoms displayed as green spheres. Green crosslinks indicate C $\alpha$ -C $\alpha$  separations < 30 Å and gray crosslinks indicate C $\alpha$ -C $\alpha$  separations of 30–50 Å. All observed crosslinks are listed in Supplementary Table 3. **(e)** Spectra of selected crosslinks.

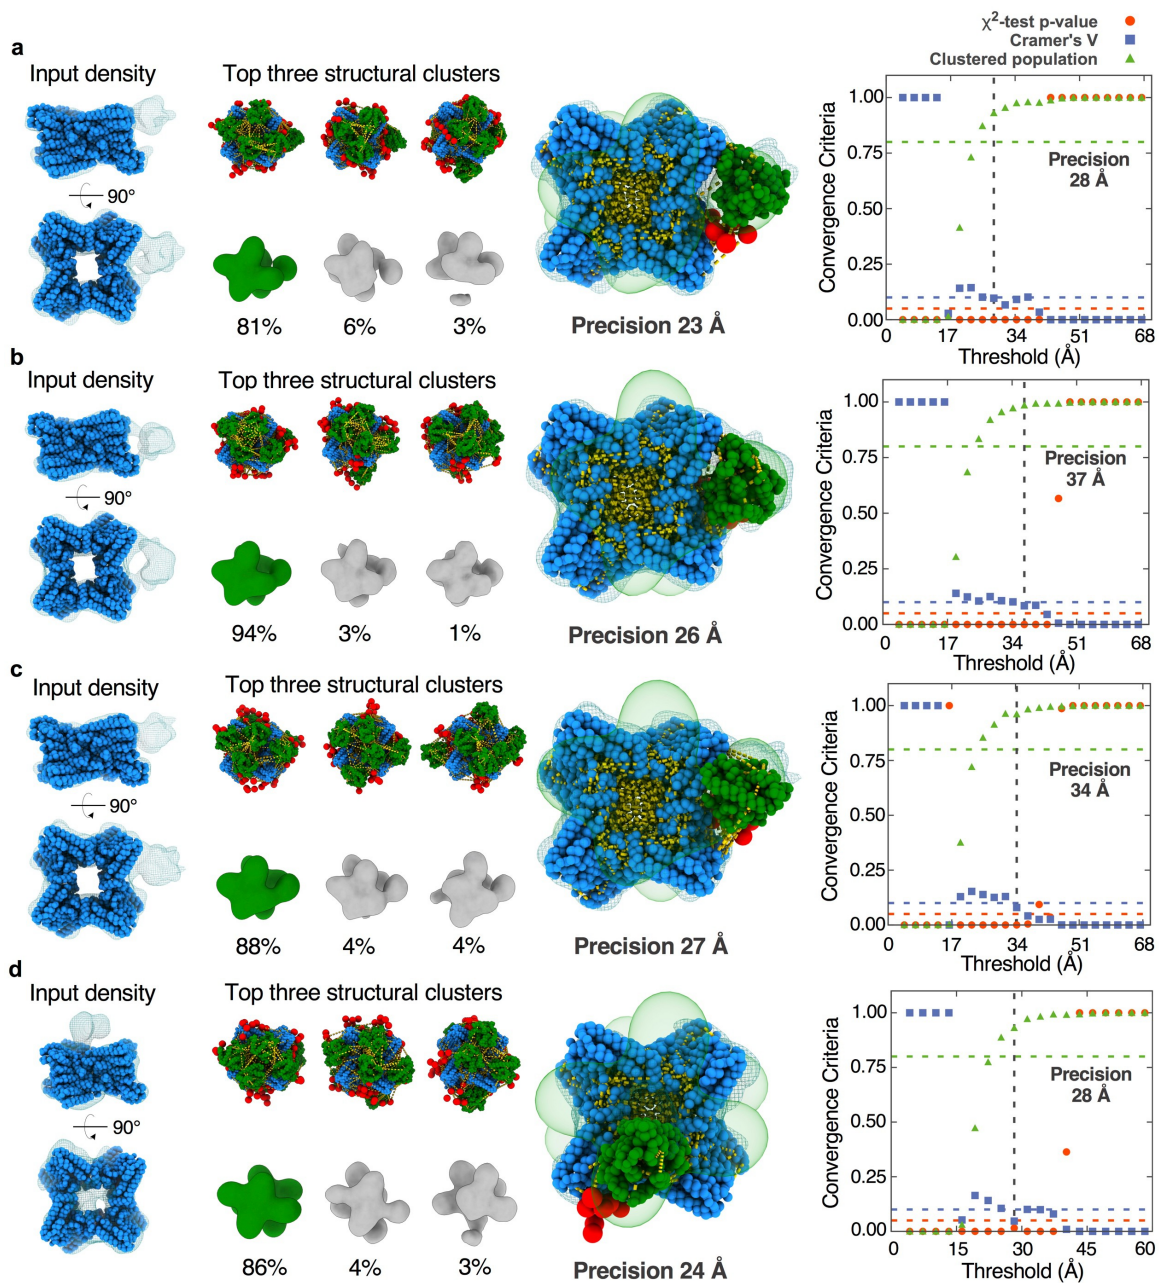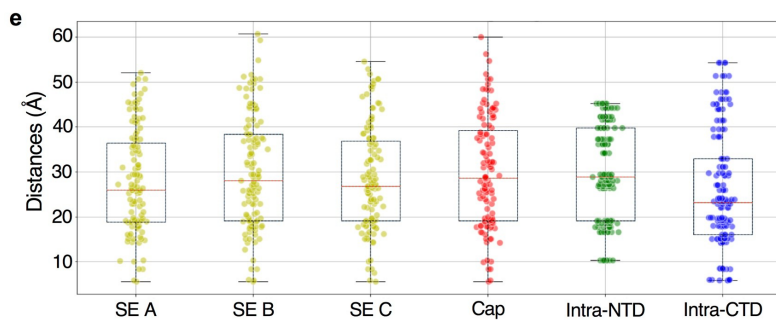

**Supplementary Fig. 15. Integrative Modeling of PaFS. (a–d)** Input density, structural clusters and validations for simulations conducted using crosslinking data and low-resolution cryo-EM maps of the Symmetry Expanded (SE) class A **(a)**, SE class B **(b)**, SE class C **(c)** and capping domain **(d)**. Input density displayed as Gaussian mixture model (GMM) with atomic coordinates of octameric prenyltransferase domain (PDB 7JTH) shown as one residue per bead. Simulations utilizing GMMs and crosslinking data resulted in 7–15 converging structural clusters (Table S4) with the top three structural clusters shown here as localization probability densities with their population percentages. The top structural cluster from each simulation is displayed with octameric prenyltransferase core (blue) and cyclase domain (green) modeled at one residue per bead and linker segment (red) shown as 10 residues per bead (red). Crosslinks are displayed as yellow dashed lines. Convergence criteria plots are shown for each simulation, with precisions reported on the graph (right). Source data are provided as a Source Data file. **(e)** Each box and whiskers plot represents the distributions of distances of observed crosslinked residue pairs from the dominant structural model in each SE or capping domain class. Crosslinks beyond 55 Å were excluded for the intra-CTD model as these were observed to be intermolecular crosslinks between distant monomers. The median modeled crosslink distance is shown as a red line in the box, with the ends of each box representing the lower and upper quartiles within the distribution of distances modeled. Whiskers and lines represent the range of the modeled distances. For all plates, source data are provided as a Source Data file.

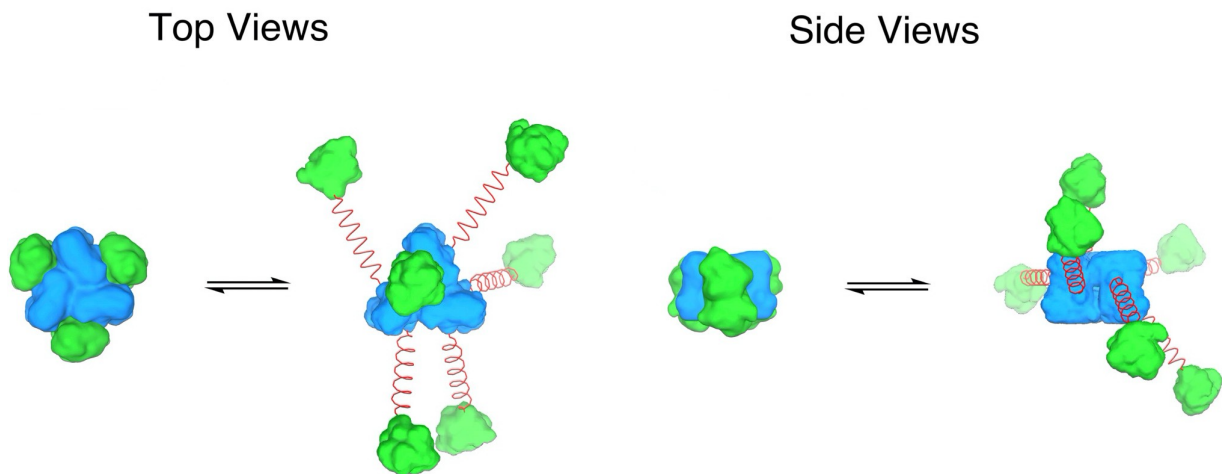

**Supplementary Fig. 16. Possible conformations of the full-length PaFS hexamer.** Prenyltransferase domains (blue) and cyclase domains (green) are represented by molecular surfaces generated with UCSF Chimera; the flexible 70-residue linker is represented by a red spring (this color scheme corresponds to the primary structure summary in Fig. 1). The compact hexamer conformation derives from the molecular envelope of N333A/Q336A PaFS calculated from small-angle X-ray scattering (SAXS) data<sup>3</sup>. Cyclase domains in splayed-out positions are modeled with an average distance of 120 Å from the prenyltransferase core.

## Supplementary References

1. Ronnebaum, T. A., Gupta, K. & Christianson, D. W. Higher-order oligomerization of a chimeric  $\alpha\beta\gamma$  bifunctional diterpene synthase with prenyltransferase and class II cyclase activities is concentration-dependent. *J. Struct. Biol.* **210**, 107463 (2020).
2. Holehouse, A. S., Das, R. K., Ahad, J. N., Richardson, M. O. G. & Pappu, R. V. CIDER: Resources to analyze sequence-ensemble relationships of intrinsically disordered proteins. *Biophys. J.* **112**, 16–21 (2017).
3. Chen, M., Chou, W. K. W., Toyomasu, T., Cane, D. E. & Christianson, D. W. Structure and function of fusicoccadiene synthase, a hexameric bifunctional diterpene synthase. *ACS Chem. Biol.* **11**, 889–899 (2016).
